1 **A deep learning algorithm using CT images to screen for Corona Virus**

2 **Disease (COVID-19)**

3 Shuai Wang<sup>1,\*</sup>, Bo Kang<sup>2,3,\*</sup>, Jinlu Ma<sup>4,\*</sup>, Xianjun Zeng<sup>5,\*</sup>, Mingming Xiao<sup>1,\*</sup>, Jia  
4 Guo<sup>3</sup>, Mengjiao Cai<sup>4</sup>, Jingyi Yang<sup>4</sup>, Yaodong Li<sup>6</sup>, Xiangfei Meng<sup>2,#</sup>, Bo Xu<sup>1,#</sup>

5

6 <sup>1</sup> Department of Molecular Radiation Oncology, National Clinical Research Center  
7 for Cancer, Key Laboratory of Cancer Prevention and Therapy, Key Laboratory of  
8 Breast Cancer Prevention and Therapy, Ministry of Education, Tianjin Clinical  
9 Research Center for Cancer, Tianjin Medical University Cancer Institute and  
10 Hospital, Tianjin 300060, China

11 <sup>2</sup> College of Intelligence and Computing, Tianjin University, Tianjin 300350, China

12 <sup>3</sup> National Supercomputer Center in Tianjin, Tianjin 300457, China

13 <sup>4</sup> Department of Radiation Oncology, First Affiliated Hospital, Xi'an Jiaotong  
14 University, Xi'an, China

15 <sup>5</sup> Department of Radiology, Nanchang University First Hospital, Nanchang, China

16 <sup>6</sup> Department of Radiology, No.8 Hospital, Xi'an Medical College, Xi'an, China

17 \* Equal contribution

18 # Corresponding authors:

19 Bo Xu, MD, PhD  
20 Tianjin Medical University Cancer Institute and Hospital  
21 Tianjin 300060, China  
22 Email: [xubo@tmu.edu.cn](mailto:xubo@tmu.edu.cn)

23

24 Xiangfei Meng, PhD  
25 National Supercomputer Center in Tianjin  
26 Tianjin 300457, China  
27 Email: [mengxf@nsc-tj.cn](mailto:mengxf@nsc-tj.cn)

28

29

## Abstract

30       **Background:** To control the spread of Corona Virus Disease (COVID-19),  
31 screening large numbers of suspected cases for appropriate quarantine and  
32 treatment is a priority. Pathogenic laboratory testing is the diagnostic gold standard  
33 but it is time consuming with significant false negative results. Fast and accurate  
34 diagnostic methods are urgently needed to combat the disease. Based on  
35 COVID-19 radiographical changes in CT images, we aimed to develop a deep  
36 learning method that could extract COVID-19's graphical features in order to provide  
37 a clinical diagnosis ahead of the pathogenic test, thus saving critical time for  
38 disease control.

39       **Methods and Findings:** We collected 1,065CT images of pathogen-confirmed  
40 COVID-19 cases (325 images) along with those previously diagnosed with typical  
41 viral pneumonia (740 images). We modified the Inception transfer-learning model  
42 to establish the algorithm, followed by internal and external validation. The internal  
43 validation achieved a total accuracy of 89.5% with specificity of 0.88 and sensitivity  
44 of 0.87. The external testing dataset showed a total accuracy of 79.3% with  
45 specificity of 0.83 and sensitivity of 0.67. In addition, in 54 COVID-19 images that  
46 first two nucleic acid test results were negative, 46 were predicted as COVID-19  
47 positive by the algorithm, with the accuracy of 85.2%.

48       **Conclusion:** These results demonstrate the proof-of-principle for using  
49 artificial intelligence to extract radiological features for timely and accurate  
50 COVID-19 diagnosis.

51       **Keywords:** COVID-19, Computed Tomography, Artificial Intelligence, Deep

52 Learning, Diagnosis

53 **Short Title:** AI to screen for COVID-19

54

## Introduction

55       The outbreak of atypical and person-to-person transmissible pneumonia  
56 caused by the severe acute respiratory syndrome coronavirus 2 (SARS-COV-2,  
57 also known as 2019-nCov) has caused a global alarm. There have been more  
58 than 500,000 confirmed cases of the Corona Virus Disease (COVID-19) in the  
59 world, as of March 26, 2020. According to the WHO, 16-21% of people with the  
60 virus in China have become severely ill with a 2-3% mortality rate. With the  
61 most recent estimated viral reproduction number ( $R_0$ ), the average number of  
62 other people that an infected individual will transmit the virus to in a completely  
63 non-immune population, stands at about 3.77 [1] , indicating that a rapid  
64 spread of the disease is imminent. It is crucial to identify infected individuals as  
65 early as possible for quarantine and treatment procedures.

66       The diagnosis of COVID-19 relies on the following criteria: clinical  
67 symptoms, epidemiological history and positive CT images, as well as positive  
68 pathogenic testing. The clinical characteristics of COVID-19 include respiratory  
69 symptoms, fever, cough, dyspnea, and pneumonia [3-6]. However, these  
70 symptoms are nonspecific, as there are isolated cases where, for example, in  
71 an asymptomatic infected family a chest CT scan revealed pneumonia and the  
72 pathogenic test for the virus came back positive. Once someone is identified  
73 as a PUI (person under investigation), lower respiratory specimens, such as  
74 bronchoalveolar lavage, tracheal aspirate or sputum, will be collected for  
75 pathogenic testing. This laboratory technology is based on real-time RT-PCR

76 and sequencing of nucleic acid from the virus [7,8]. Since the beginning of the  
77 outbreak, the efficiency of nucleic acid testing has been dependent on several  
78 rate-limiting factors, including availability and quantity of the testing kits in the  
79 affected area. More importantly, the quality, stability and reproducibility of the  
80 detection kits are questionable. The impact of methodology, disease stages,  
81 specimen collection methods, nucleic acid extraction methods, and the  
82 amplification system are all determinant factors for the accuracy of test results.  
83 Conservative estimates of the detection rate of nucleic acid are low (between  
84 30-50%) [7,8,9], and tests need to be repeated several times in many cases  
85 before they can be confirmed.

86 Radiological imaging is also a major diagnostic tool for COVID-19. The  
87 majority of COVID-19 cases have similar features on CT images including  
88 ground-glass opacities in the early stage and pulmonary consolidation in the  
89 late stage. There is also sometimes a rounded morphology and a peripheral  
90 lung distribution [6,10]. Although typical CT images may help early screening  
91 of suspected cases, the images of various viral pneumonias are similar and  
92 they overlap with other infectious and inflammatory lung diseases. Therefore, it  
93 is difficult for radiologists to distinguish COVID-19 from other viral pneumonias.

94 Artificial Intelligence involving medical imaging deep-learning systems has  
95 been developed in image feature extraction, including shape and spatial  
96 relation features. Specifically, Convolutional Neural Network (CNN) has been  
97 proven in feature extraction and learning. CNN was used to enhance low-light

98 images from high-speed video endoscopy with the limited training data being  
99 just 55 videos [11]. Also, CNN has been applied to identify the nature of  
100 pulmonary nodules via CT images, the diagnosis of pediatric pneumonia via  
101 chest X-ray images, automated precising and labeling of polyps during  
102 colonoscopic videos, cystoscopic image recognition extraction from videos  
103 [12-15].

104 There are a number of features for identifying viral pathogens on the basis  
105 of imaging patterns, which are associated with their specific pathogenesis [16].  
106 The hallmarks of COVID-19 are bilateral distribution of patchy shadows and  
107 ground glass opacity in early stages. As the disease progresses, multiple  
108 ground glass and infiltrates in both lungs will appear [3]. These features are  
109 quite similar to typical viral pneumonia with only slight differences, which are  
110 difficult to be distinguished by radiologists. Based on this, we believed that  
111 CNN might help us identify unique features that might be difficult for visual  
112 recognition.

113 Hence, the purpose of our study was to evaluate the diagnostic  
114 performance of a deep learning algorithm using CT images to screen for  
115 COVID-19 during the influenza season. To test this notion, we retrospectively  
116 enrolled 1,065 CT images of pathogen-confirmed COVID-19 cases along with  
117 previously diagnosed typical viral pneumonia. Our results reported below  
118 demonstrate the proof-of-principle using the deep learning method to extract  
119 radiological graphical features for COVID-19 diagnosis.

120

## Methods and Materials

121

### **Retrospective collection of datasets.**

122

We retrospectively collected CT images from 259 patients, in which the

123

cohort includes 180 cases of typical viral pneumonia and the other 79 cases

124

from three hospitals with confirmed nucleic acid testing of SARS-COV-2. In

125

addition, we enrolled additional 15 COVID cases, in which first two nucleic acid

126

tests were negative at initial diagnoses. Hospitals providing the images were

127

Xi'an Jiaotong University First Affiliated Hospital (Center 1), Nanchang

128

University First Hospital (Center 2) and Xi'an No.8 Hospital of Xi'an Medical

129

College (Center 3). All CT images were de-identified before sending for

130

analysis. This study is in compliance with the Institutional Review Board of

131

each participating institutes. Informed consent was exempted by the IRB

132

because of the retrospective nature of this study.

133

### **Delineation of ROIs**

134

To establish a binary model for distinguishing COVID-19 and typical

135

pneumonia, we drew the Region Of Interest (ROI) as input images for the

136

training cohort and validation cohorts. We sketched the ROI from CT images

137

based on features of COVID-19, such as small patchy shadows and interstitial

138

changes in the early stage, multiple ground glass and infiltrates in both lungs in

139

the progression stage, and delineated the ROIs on the CT images of other

140

typical viral pneumonia such as pseudocavity, enlarged lymphnodes and

141

multifocal GGO as the control. The ROIs were divided into three cohorts: one

142 training cohort (n=320 from Center 1), one internal validation cohort (n=455  
143 from Center 1) and one external validation cohort (n=290 from Center 2 and 3).  
144 For a ROI, it is sized approximately from 395\*223 to 636\*533 pixels.

#### 145 **Overview of the proposed architecture**

146 Our systematic pipeline for the prediction architecture is depicted in **Figure**  
147 **1**. The architecture consists of three main processes: 1) Pre-processing of  
148 input images; 2) Feature extraction of ROI images and training; and 3)  
149 Classification with fully connected network and prediction of multiple classifiers.  
150 We built a transfer learning neural network based on the Inception network.  
151 The entire neural network can be roughly divided into two parts: the first part  
152 used a pre-trained inception network to convert image data into  
153 one-dimensional feature vectors, and the second part used a fully connected  
154 network and the main role is for classification prediction. ROI images from  
155 each case were preprocessed and inputted into the model for training. The  
156 number of various types of pictures in the training set is equal, with a total  
157 number of 320. The remaining CT pictures of each case were used for internal  
158 validation. The model training was iterated 15,000 times with a step size of  
159 0.01.

160



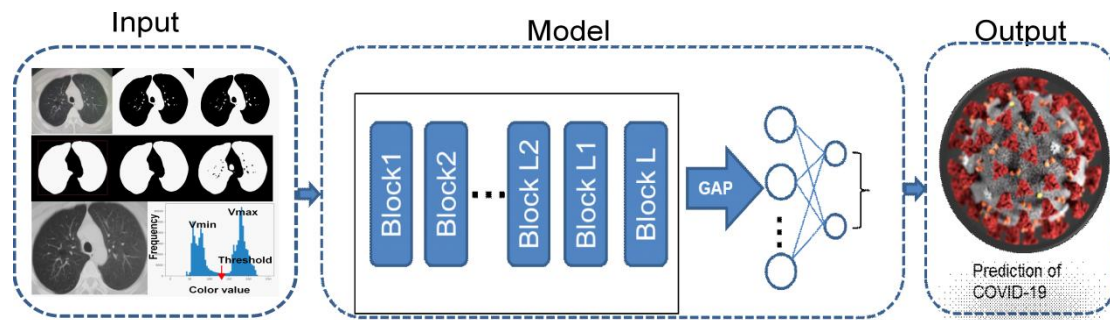

161

162 **Figure 1.** ROI images extraction and Deep Learning (DL) algorithm  
163 framework. ROI images were extracted by the CV model and then trained  
164 using a modified Inception network to extract features. The full connection  
165 layer then makes a classification and prediction.

#### 166 **Image preprocessing and feature extraction.**

167 Based on the signs of characteristic of pneumonia, ROI images were  
168 defined inflammatory lesions and extracted by our computer vision (CV) model  
169 following the steps. 1) Convert the image to grayscale. 2) Binarize grayscale.  
170 Because using the OSTU's method directly may cause the threshold selection  
171 failure in the case of multi-peaks, the selection of the binarization threshold in  
172 this paper was based on the statistics of all pixel frequency histograms of the  
173 gray color values  $V_{min}$  (80) and  $V_{max}$  (200). The minimum frequency in the  
174 selection interval is threshold, and the interval of frequency statistics is five. 3)  
175 Background area filling. Using the flood filling method to expand the image by  
176 1 black pixel, and fill the black pixels near the border with white. 4) Reverse  
177 color, find all the contour areas of the image, and keep the two largest contour  
178 areas as the two lung areas. 5) Take the smallest bounding rectangle of the  
179 lung area as the ROI frame and crop the original image to obtain the ROI

180 images. The delineated ROIs were obtained for classification model building.  
 181 We modified the typical Inception network, and fine-tuned the modified  
 182 Inception (M-Inception) model with pre-trained weights. During the training  
 183 phase, the original Inception part was not trained, and we only trained the  
 184 modified part. The architecture of M-Inception is shown in **Table 1**. The  
 185 difference between Inception and M-Inception in classification lies in the last  
 186 fully-connected layers. We reduced the dimension of features before it was  
 187 sent to the final classification layer. The training dataset made up of all those  
 188 patches aforementioned. The Inception network is shown in **Table 1**.

189 **Table 1. The architecture of M-Inception**

|                   | Layer       | Patch size/stride or remarks |
|-------------------|-------------|------------------------------|
| Inception<br>part | conv        | 3x3/2                        |
|                   | conv        | 3x3/1                        |
|                   | conv padded | 3x3/1                        |
|                   | pool        | 3x3/2                        |
|                   | conv        | 3x3/1                        |
|                   | conv        | 3x3/2                        |
|                   | conv        | 3x3/1                        |
|                   | Inception   | 3x, 5x, 2x                   |
|                   | pool        | 8x8                          |
|                   | linear      | logits                       |

|                  | softmax | classifier                                                                                    |
|------------------|---------|-----------------------------------------------------------------------------------------------|
| Modified<br>part | Fc1     | $\begin{bmatrix} \text{batchnorm} \\ \text{dropout}(0.5) \\ 512\text{d Linear} \end{bmatrix}$ |
|                  | Fc2     | $\begin{bmatrix} \text{batchnorm} \\ \text{dropout}(0.5) \\ 2\text{d Linear} \end{bmatrix}$   |

190

191 **Prediction.**

192 After generating the features, the final step was to classify the pneumonia  
193 based on those features. Ensembling of classifiers was used to improve the  
194 classification accuracy. In this study, we adopted end-to-end learning to make  
195 the model convergence.

196 **Performance evaluation metrics.**

197 We compared the classification performance using Accuracy, Sensitivity,  
198 Specificity, Area Under Curve (AUC), Positive predictive value (PPV), Negative  
199 predictive value (NPV), F1 score and Youden Index. TP and TN represent the  
200 number of true positive or true negative samples. FP and FN mean the number  
201 of false positive or false negative samples. Sensitivity measures the ratio of  
202 positives that are correctly discriminated. Specificity measures the ratio of  
203 negatives that are correctly discriminated. AUC is an index to measure the  
204 performance of the classifier. NPV was used to evaluate the algorithm for  
205 screening, and PPV was the probability of getting a disease when the  
206 diagnostic index is positive. Youden Index was the determining exponent of the  
207 optimal bound. F1 score was a measure of the accuracy of a binary model.

208 Additionally, performance was evaluated with F-measure (F1) to compare the  
209 similarity and diversity of performance. Kappa value measures the agreement  
210 between the CNN model prediction and the clinical report.  
211

212

## Results

213

### Algorithm development.

214

215

216

217

218

219

220

221

222

223

224

225

226

227

228

229

230

231

232

In order to develop a deep learning algorithm for the identification of viral pneumonia images, we initially enrolled 259 patients, in which the cohort includes 180 cases of typical viral pneumonia that were diagnosed previously before the COVID-19 outbreak. These patients are termed COVID-19 negative in the cohort. The other 79 cases were from the three hospitals with confirmed nucleic acid testing of SARS-COV-2, therefore termed COVID-19 positive. Two radiologists were asked to review the images and sketched 1,065 representative images (740 for COVID-19 negative and 325 for COVID-19 positive) for analysis (**Figure 2** is shown as an example). These images were randomly divided into a training set and a validation set. The model training was iterated for 15,000 times with a step size of 0.01. The training loss curve is shown in **Figure 3A**. 320 images (160 images from COVID-19 negative and 160 images from COVID-19 positive) were obtained to construct the model. To test the stability and generalization of the model, 455 images (COVID-19 negative 360 images and COVID-19 positive 95 images) were obtained for internal validation from Center 1 and 290 images (COVID-19 negative 220 images and COVID-19 positive 70 images) were obtained from Center 2 and 3 for external validation. The model training was also iterated for 15,000 times with a step size of 0.01. The training loss curve is shown in **Figure 3B**.

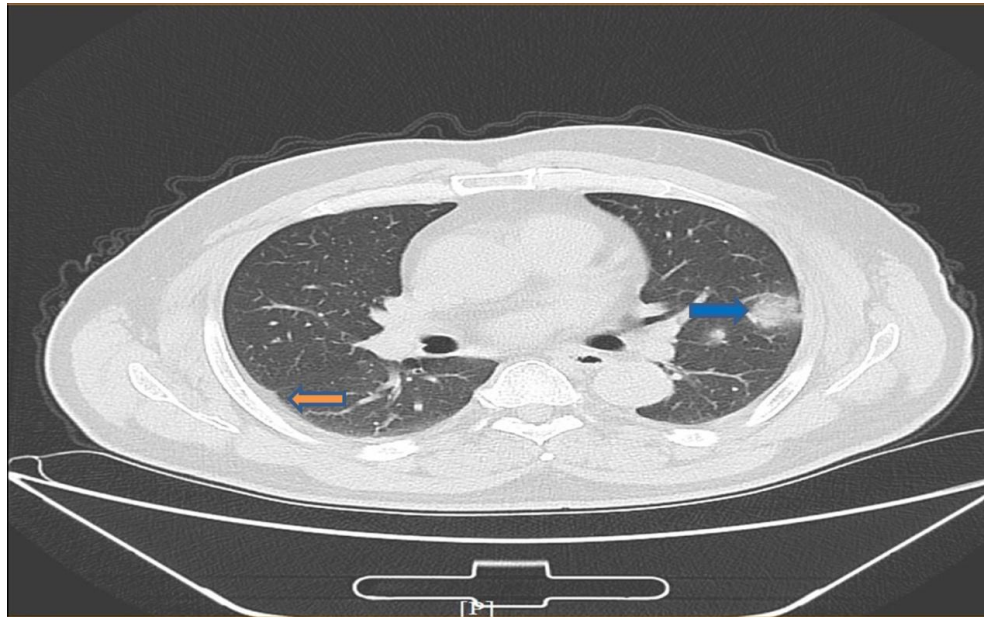

233

234

235 **Figure 2.** An example of COVID-19 pneumonia features. The blue arrow  
236 points to ground-glass opacity, and the yellow arrow points to the pleural  
237 indentation sign.

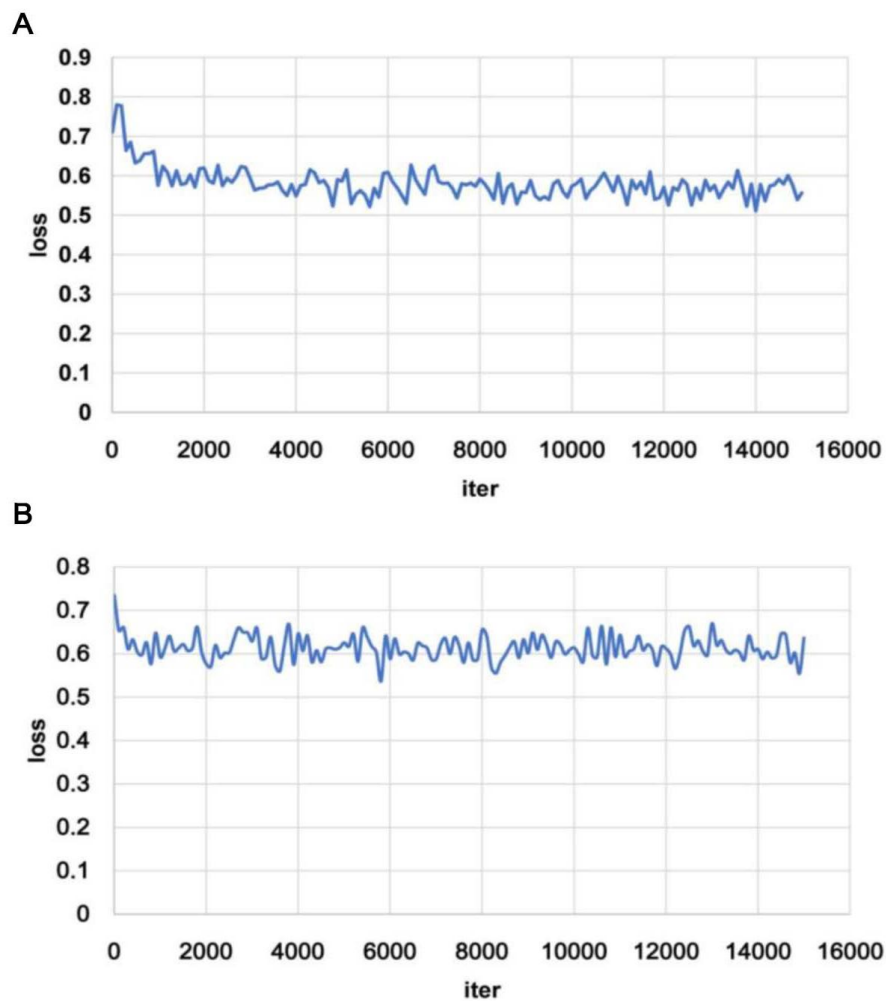

238

239 **Figure 3.** Training loss curves of the models on internal **(A)** and external **(B)**  
240 validation. The loss curve tends to be stable after descending, indicating that  
241 the training process converges

242 **Deep learning performance.**

243 The deep learning algorithm yielded an AUC of 0.93 (95% CI, 0.90 to 0.96)  
244 on the internal validation and 0.81 (95% CI, 0.71 to 0.84) on the external  
245 validation based on the number of CT images **(Figure 4)**. Using the maximized  
246 Youden index threshold probability, the sensitivity was 0.88 and 0.83,

247 specificity 0.87 and 0.67, the accuracy 89.5% and 79.3%, the negative  
248 prediction values 0.95 and 0.90, the Youden indexes 0.75 and 0.48, and the F1  
249 scores were 0.77 and 0.63 for the internal and external datasets, respectively  
250 (**Table 2**). The kappa values were 0.69 and 0.48 for internal and external  
251 validation, indicating that prediction of COVID-19 from the CNN model is a  
252 highly consistent with pathogenic testing results. We also performed an  
253 external validation based on each patient's multiple images. The accuracy was  
254 82.5%, with the sensitivity 0.75, the specificity 0.86, the PPV 0.69, the NPV  
255 0.89, and the kappa value 0.59.



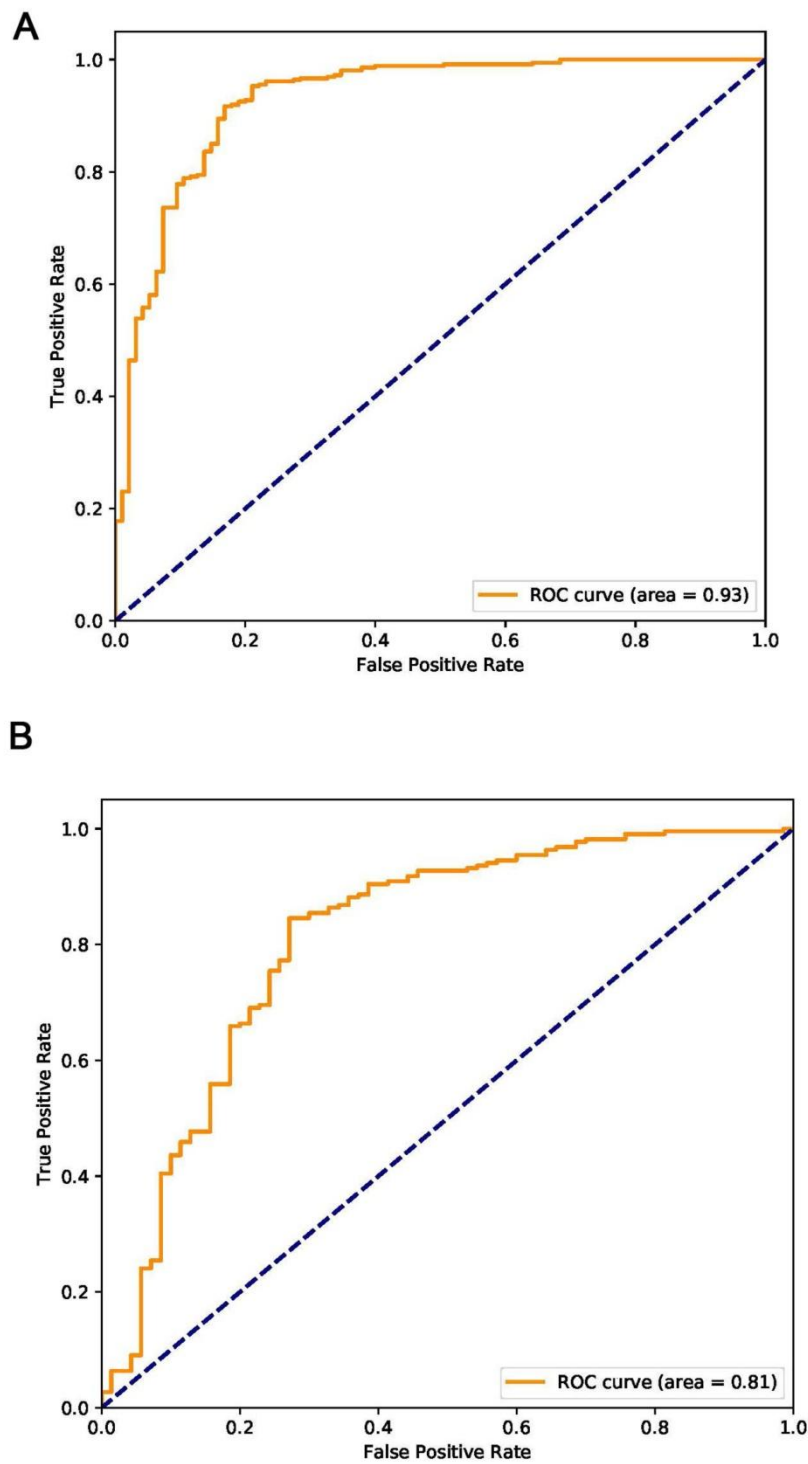

256

257 **Figure 4.** Receiver operating characteristic plots for COVID-19 identification

258 for the deep learning (Inception) algorithm. A) Internal Validation. B) External

259 Validation.

260

261

**Table 2. Deep learning Algorithm Performance**

| Performance Metric | Internal           | External           |
|--------------------|--------------------|--------------------|
| AUC (95%CI)        | 0.93(0.86 to 0.94) | 0.81(0.71 to 0.84) |
| Accuracy, %        | 89.5               | 79.3               |
| Sensitivity        | 0.88               | 0.83               |
| Specificity        | 0.87               | 0.67               |
| PPV                | 0.71               | 0.55               |
| NPV                | 0.95               | 0.90               |
| Kappa*             | 0.69               | 0.48               |
| Yoden index        | 0.75               | 0.50               |
| F1 score‡          | 0.77               | 0.63               |

262 \* Measures the agreement between the CNN model prediction and the clinical  
263 diagnosis. ‡Measures the accuracy of the CNN model.

264

### 265 **Comparison of AI with radiologist prediction.**

266 At the same time, we asked two skilled radiologists to assess the 745  
267 images for a prediction. Radiologist 1 achieved the accuracy of 55.8% with  
268 sensitivity of 0.71 and specificity of 0.51, and Radiologist 2 achieved a similar  
269 accuracy of 55.4% with sensitivity of 0.73 and specificity of 0.50 (**Table 3**).  
270 These results indicates that it is difficult for radiologists to make prediction of  
271 COVID-19 with eye recognition, further showing the advantage of the  
272 algorithm we developed.

273

274

275

276 **Table 3. Performance metrics for the CNN model versus skilled**  
277 **radiologists.**

278

| Performance Metric | Internal | External<br>(Based on<br>ROI) | External<br>(Based on<br>patients) | R1   | R2   |
|--------------------|----------|-------------------------------|------------------------------------|------|------|
| Accuracy, %        | 89.5     | 79.3                          | 82.5                               | 55.8 | 55.4 |
| Sensitivity        | 0.88     | 0.83                          | 0.75                               | 0.71 | 0.73 |
| Specificity        | 0.87     | 0.67                          | 0.86                               | 0.51 | 0.5  |
| PPV                | 0.71     | 0.55                          | 0.69                               | 0.29 | 0.29 |
| NPV                | 0.95     | 0.90                          | 0.89                               | 0.86 | 0.86 |
| F1 score           | 0.77     | 0.63                          | 0.72                               | 0.41 | 0.42 |
| Kappa              | 0.69     | 0.48                          | 0.59                               | 0.15 | 0.15 |
| Yoden index        | 0.75     | 0.50                          | 0.61                               | 0.22 | 0.23 |

279

280 **Prediction of COVID-19 on CT images from pathogenic negative**  
281 **patients.**

282 Because high false negative results were frequently reported from nucleic  
283 acid testing, we aimed to test whether the algorithm could detect COVID-19  
284 when the pathogenic test came negative. To achieve this goal, we enrolled  
285 additional 15 COVID-19 cases, in which initial two nucleic acid tests came  
286 negative and for the third test they became positive. These CT results were  
287 taken on the same day of the nucleic acid tests (**Figure 5**). Interestingly, we  
288 found that, 46 out of the 54 images when nucleic acid test results were  
289 negative were predicted as COVID-19 positive by the algorithm, with the  
290 accuracy of 85.2%. These results indicate that the algorithm has high value  
291 serving as a screening method for COVID-19.

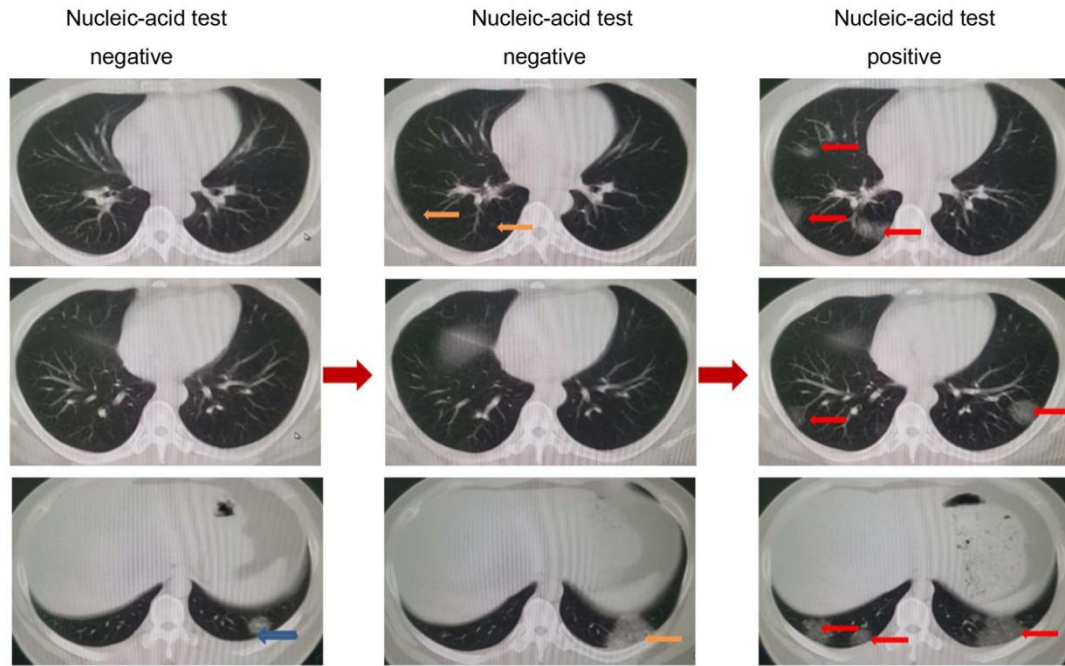

292

293 **Figure 5.** Representative images from a COVID-19 patient with two negatively  
294 reported nucleic acid tests at earlier stages and one final positively reported  
295 test at a later stage. On the left, only one inflammatory lesion (blue arrow) can  
296 be seen near diaphragm. In the middle, lesions (yellow arrows) were found in  
297 two levels of images. On the right, the images were taken on the ninth day  
298 after admission. The inflammation continued to progress, extending to both  
299 lungs (red arrows), and the nucleic acid test became positive.

300

301

## Discussion

302 Timely diagnosis and triaging of PUIs are crucial for the control of  
303 emerging infectious diseases such as the current COVID-19. Due to the  
304 limitation of nucleic acid -based laboratory testing, there is an urgent need to  
305 look for fast alternative methods that can be used by front-line health care  
306 personals for quickly and accurately diagnosing the disease {Rao, 2020 #67}.  
307 In the present study, we have developed an AI program by analyzing  
308 representative CT images using a deep learning method. This is a  
309 retrospective, multicohort, diagnostic study using our modified Inception  
310 migration neuro network, which has achieved an overall 89.5% accuracy.  
311 Moreover, the high performance of the deep learning model we developed in  
312 this study was tested using external samples with 79.3% accuracy. More  
313 importantly, as a screening method, our model achieved a relative high  
314 sensitivity, 0.88 and 0.83 on internal and external datasets, respectively.  
315 Furthermore, the model achieved a performance on the patient level, with the  
316 accuracy of 82.5%. During current COVID-19 global pandemics, this CNN  
317 model can potentially serve as a powerful tool for COVID-19 screening.

318 It is important to note that our model aims to distinguish between  
319 COVID-19 and other typical viral pneumonia, both of which have similar  
320 radiologic characteristics. We compared the performance of our model with  
321 that of two skilled radiologists, and our model has shown much higher  
322 accuracy and sensitivity. These findings have demonstrated the

323 proof-of-principle that deep learning can extract CT image features of  
324 COVID-19 for diagnostic purposes. Using the supercomputer system, the time  
325 for each case takes only about 10 seconds, and it can be performed remotely  
326 via a shared public platform. Therefore, further developing this system can  
327 significantly shorten the diagnosis time for disease screening, especially at the  
328 time when many places have nucleic acid test shortage. Our study represents  
329 the first study to apply artificial intelligence technologies to CT images for  
330 effectively screening for COVID-19.

331 The gold standard for COVID-19 diagnosis has been nucleic acid based  
332 detection for the existence of specific sequences of the SARS-COV-2 gene.  
333 While we still value the importance of nucleic acid detection in the diagnosis of  
334 SARS-COV-2 infection, we must also note that the high number of false  
335 negatives due to several factors such as methodological disadvantages,  
336 disease stages, and methods for specimen collection might delay diagnosis  
337 and disease control. Recent data have suggested that the accuracy of nucleic  
338 acid testing is only about 30-50% [6,7,8]. Using CT imaging feature extraction,  
339 we are able to achieve above 89.5% accuracy, significantly outplaying nucleic  
340 acid testing. More interestingly, testing CT images from COVID-19 patients  
341 when initial pathogenic testing came negative, our model has achieved the  
342 accuracy of 85.2% for correctly predicting COVID-19. According to a study  
343 authored by Xia L et al, 75% patients with negative RT-PCR results had  
344 positive CT findings [17]. The study also recommended that chest CT as a

345 primary tool for the current COVID-19 detection in affected areas.

346 Deep learning methods have been used to solve data-rich biology and  
347 medicine. A large number of labeled data is required for training [18]. Although  
348 we are satisfied with the initial results, we believe that with more CT images  
349 included in the training, we will achieve higher accuracy. Therefore, further  
350 optimizing and testing this system is warranted. To achieve this, we have  
351 generated a webpage that licensed healthcare personnel can access to upload  
352 CT images for testing and validation. The webpage information is as following:  
353 [https://ai.nscg-tj.cn/thai/deploy/public/pneumonia\\_ct](https://ai.nscg-tj.cn/thai/deploy/public/pneumonia_ct).

354 There are some limitations to our study. Although DL has been used to  
355 represent and learn predictable relationships in many diverse forms of data,  
356 and it holds promise for applications in precision medicine, many factors such  
357 as low signal to noise and complex data integration have challenged the DL  
358 efficacy [19]. CT images represent a difficult classification task due to the  
359 relatively large number of variable objects, specifically the imaged areas  
360 outside the lungs that are irrelevant to the diagnosis of pneumonia [12]. In  
361 addition, the training data set is relatively small. The performance of this  
362 system is expected to increase when the training volume is increased. It  
363 should also be noted that, the features of the CT images we analyzed were  
364 from patients with severe lung lesions at later stages of disease development.  
365 Although we have enrolled 15 cases of COVID patients for assessing the value  
366 of the algorithm for early diagnosis, larger numbers of database to associate

367 this with the disease progress and all pathologic stages of COVID-19 is  
368 necessary to optimize the diagnostic system.

369 In future, we intend to link hierarchical features of CT images to features of  
370 other factors such as genetic, epidemiological and clinical information for  
371 multi-modeling analysis for an enhanced diagnosis. The artificial intelligence  
372 system developed in our study should significantly contribute to COVID-19  
373 disease control by reducing the number of PUIs for timely quarantine and  
374 treatment.

375



376 **Ethics Committee Approval and Patient Consent:** This study complies with  
377 the Institutional Review Board of each participating institutes. Informed  
378 consent was exempted by the IRB because of the retrospective nature of this  
379 study.

380 **Funding Source:** None

381 **Competing interests:** The authors have declared that no competing interest  
382 exists

383 **Abbreviations:**

384 COVID-19, Corona Virus Disease

385 CT, Computed Tomography

386 SARS-COV-2, severe acute respiratory syndrome coronavirus 2Convolutional

387 CNN, Neural Network

388 ROI, region of interest

389 M-Inception, modified Inception

390 AUC, Area Under Curve

391 PPV, Positive predictive value

392 NPV, Negative predictive value

393 CV, computer vision

394

395

## Reference

396

397 1. Yang Y, Lu Q, Liu M, Wang Y, Zhang A, Jalali N, et al. Epidemiological and  
398 clinical features of the 2019 novel coronavirus outbreak in China. medRxiv  
399 [Preprint]. 2020 medRxiv [posted February 21], Available  
400 from: <https://www.medrxiv.org/content/10.1101/2020.02.10.20021675v2> doi:10  
401 .1101/2020.02.10.20021675

402 2. Rao ASRS, Vazquez JA. Identification of COVID-19 Can be Quicker through  
403 Artificial Intelligence framework using a Mobile Phone-Based Survey in the  
404 Populations when Cities/Towns Are Under. *Infect Control Hosp Epidemiol.*  
405 2020;1–18.

406 3. Wang D, Hu B, Hu C, Zhu F, Liu X, Zhang J, et al. Clinical Characteristics of  
407 138 Hospitalized Patients With 2019 Novel Coronavirus-Infected Pneumonia  
408 in Wuhan, China. *Jama.* 2020

409 4. Chen N, Zhou M, Dong X, Qu J, Gong F, Han Y, et al. Epidemiological and  
410 clinical characteristics of 99 cases of 2019 novel coronavirus pneumonia in  
411 Wuhan, China: a descriptive study. *Lancet.* 2020.

412 5. Li Q, Guan X, Wu P, Wang X, Zhou L, Tong Y, et al. Early Transmission  
413 Dynamics in Wuhan, China, of Novel Coronavirus-Infected Pneumonia. *The*  
414 *New England journal of medicine* . 2020.

415 6. Huang C, Wang Y, Li X, Ren L, Zhao J, Hu Y, et al. Clinical features of  
416 patients infected with 2019 novel coronavirus in Wuhan, China. *Lancet.* 2020.

417 7. Corman VM, Landt O, Kaiser M, Molenkamp R, Meijer A, Chu DK, et al.

- 418 Detection of 2019 novel coronavirus (2019-nCoV) by real-time RT-PCR. Euro  
419 surveillance : bulletin Europeen sur les maladies transmissibles = European  
420 communicable disease bulletin. 2020; 25(3).
- 421 8. Chu DKW, Pan Y, Cheng SMS, Hui KPY, Krishnan P, Liu Y, et al. Molecular  
422 Diagnosis of a Novel Coronavirus (2019-nCoV) Causing an Outbreak of  
423 Pneumonia. *Clinical chemistry*. 2020.
- 424 9. Zhang N, Wang L, Deng X, Liang R, Su M, He C, et al. Recent advances in  
425 the detection of respiratory virus infection in humans. *J Med Virol*. 2020.
- 426 10. Chung M, Bernheim A, Mei X, Zhang N, Huang M, Zeng X, et al. CT  
427 Imaging Features of 2019 Novel Coronavirus (2019-nCoV). *Radiology*. 2020:  
428 200230.
- 429 11. Gomez P, Semmler M, Schutzenberger A, Bohr C, Dollinger M. Low-light  
430 image enhancement of high-speed endoscopic videos using a convolutional  
431 neural network. *Med Biol Eng Comput*. 2019; 57(7): 1451-63.
- 432 12. Choe J, Lee SM, Do KH, Lee G, Lee JG, Lee SM, et al. Deep  
433 Learning-based Image Conversion of CT Reconstruction Kernels Improves  
434 Radiomics Reproducibility for Pulmonary Nodules or Masses. *Radiology*. 2019;  
435 292(2): 365-73.
- 436 13. Kermany DS, Goldbaum M, Cai W, Valentim CCS, Liang H, Baxter SL, et al.  
437 Identifying Medical Diagnoses and Treatable Diseases by Image-Based Deep  
438 Learning. *Cell* 2018; 172(5): 1122-31.
- 439 14. Negassi M, Suarez-Ibarrola R, Hein S, Miernik A, Reiterer A. Application of

440 artificial neural networks for automated analysis of cystoscopic images: a  
441 review of the current status and future prospects. *World J Urol.* 2020.

442 15. Wang P, Xiao X, Glissen Brown JR, Berzin TM, Tu M, Xiong F, et al.  
443 Development and validation of a deep-learning algorithm for the detection of  
444 polyps during colonoscopy. *Nat Biomed Eng.* 2018; 2(10): 741-8.

445 16. Koo HJ, Lim S, Choe J, Choi SH, Sung H, Do KH. Radiographic and CT  
446 Features of Viral Pneumonia. *Radiographics.* 2018; 38(3): 719-39.

447 17. Ai T, Yang Z, Hou H, Zhan C, Chen C, Lv W, et al. Correlation of Chest CT  
448 and RT-PCR Testing in Coronavirus Disease 2019 (COVID-19) in China: A  
449 Report of 1014 Cases [published online ahead of print, 2020 Feb 26].  
450 *Radiology.* 2020;200642.

451 18. Ching T, Himmelstein DS, Beaulieu-Jones BK, Kalinin AA, Do BT, Way GP, et  
452 al. Opportunities and obstacles for deep learning in biology and medicine. *J R*  
453 *Soc Interface.* 2018;15(141):20170387. doi:10.1098/rsif.2017.0387

454 19. Grapov D, Fahrmann J, Wanichthanarak K, Khoomrung S. Rise of Deep  
455 Learning for Genomic, Proteomic, and Metabolomic Data Integration in  
456 Precision Medicine. *OMICS.* 2018;22(10):630–636.

457
